# Supplementary material for: A new reduced-morphology model for CA1 pyramidal cells and its validation and comparison with other models using HippoUnit
Source: PubMed Central journal article supplement (PMC8027802; doi:10.1038/s41598-021-87002-7), 2021-04-07
Supplement: 41598_2021_87002_MOESM1_ESM.pdf [file 41598_2021_87002_MOESM1_ESM.pdf]

## **Supplemental information**

### **A new reduced-morphology model for CA1 pyramidal cells and its validation and comparison with other models using HippoUnit**

Matus Tomko, Lubica Benuskova, Peter Jedlicka

**Supplementary Table S1: Uniformly distributed passive parameters, active ionic conductances and reversal potentials of channels for each section of the To21 model**

| <b>Mechanism</b>                              | <b>Somatic</b> | <b>Axonal</b> | <b>Basal</b> | <b>Apical</b> | <b>Trunk</b> |
|-----------------------------------------------|----------------|---------------|--------------|---------------|--------------|
| $C_m$ ( $\mu\text{F}/\text{cm}^2$ )           | 1              | 1             | 1            | 1             | 1            |
| $R_A$ ( $\Omega/\text{cm}^2$ )                | 115.3958       | 85.2024       | 115.3958     | 115.3958      | 115.3958     |
| $g_{\text{Na}}$ ( $\text{S}/\text{cm}^2$ )    | 0.035          | 0.035         | 0.03828      | 0.03828       | 0.025        |
| $g_{\text{Kdr}}$ ( $\text{S}/\text{cm}^2$ )   | 0.0015         | 0.01166       | 0.004304     | 0.004304      | 0.02         |
| $g_{\text{KM}}$ ( $\text{S}/\text{cm}^2$ )    | 0.001          | 0.02647       | -            | -             | -            |
| $g_{\text{KCa}}$ ( $\text{S}/\text{cm}^2$ )   | 0.0015         | -             | 9.0311e-05   | 9.0311e-05    | 9.0311e-05   |
| $g_{\text{KCagk}}$ ( $\text{S}/\text{cm}^2$ ) | 4.4820e-05     | -             | 4.4820e-05   | 4.4820e-05    | 4.4820e-05   |
| $g_{\text{CaL}}$ ( $\text{S}/\text{cm}^2$ )   | 0.0005         | -             | 8.0325e-06   | 8.0325e-06    | 8.0325e-06   |
| $g_{\text{CaN}}$ ( $\text{S}/\text{cm}^2$ )   | 2.2619e-06     | -             | 2.2619e-06   | 2.2619e-06    | 2.2619e-06   |
| $g_{\text{CaT}}$ ( $\text{S}/\text{cm}^2$ )   | 0.00005        | -             | 1.1849e-06   | 1.1849e-06    | 1.1849e-06   |
| $g_L$ ( $\text{S}/\text{cm}^2$ )              | 9.03139e-05    | 0.0001289     | 9.03139e-05  | 9.03139e-05   | 9.03139e-05  |
| $[\text{Ca}^{2+}]_o$ (mM)                     | 50e-6          | -             | 50e-6        | 50e-6         | 50e-6        |
| $\tau_{\text{Ca}}$ (ms)                       | 100            | -             | 100          | 100           | 100          |
| $E_{\text{Na}}$ (mV)                          | 50             | 50            | 50           | 50            | 50           |
| $E_{\text{K}}$ (mV)                           | -90            | -90           | -90          | -90           | -90          |

**Supplementary Table S2:  $K_A$ ,  $I_h$  conductances and reversal potential of passive current in individual sections of the To21**

| <b>Section / Mechanism</b> | <b><math>g_{KA}</math> (S/cm<sup>2</sup>)</b> | <b><math>g_{Ih}</math> (S/cm<sup>2</sup>)</b> | <b><math>E_L</math> (mV)</b> |
|----------------------------|-----------------------------------------------|-----------------------------------------------|------------------------------|
| Soma                       | 0.0075                                        | 1.9042e-05                                    | -65.7269                     |
| Axon                       | 0.1637                                        | -                                             | -79.9171                     |
| Proximal SO dendrite       | 0.001433                                      | 5.0462e-05                                    | -67.5602                     |
| Distal SO dendrite         | 0.02522                                       | 0.0001361                                     | -72.5602                     |
| Thick proximal SR dendrite | 0.1                                           | 5.04624e-05                                   | -67.5602                     |
| Thick medium SR dendrite   | 0.15                                          | 0.0001076                                     | -70.8936                     |
| Thick distal SR dendrite   | 0.2                                           | 0.0001933                                     | -75.8936                     |
| Thin SR dendrite 1         | 0.006259                                      | 9.3308e-05                                    | -70.06023                    |
| Thin SR dendrite 1         | 0.03834                                       | 0.0001504                                     | -73.3936                     |
| Thin SR dendrite 1         | 0.1613                                        | 0.0002361                                     | -78.3936                     |
| Thick SLM dendrite         | 0.1855                                        | 0.0002789                                     | -80.8936                     |
| Medium SLM dendrite        | 0.1926                                        | 0.0003361                                     | -84.2269                     |
| Thin SLM dendrite          | 0.1936                                        | 0.0003789                                     | -86.7269                     |

**Supplementary Table S3: Active and passive properties used in models**

| Channel /<br>Current<br>name                                  | Mod file | Sections                    |                              |                             |                             |                             |
|---------------------------------------------------------------|----------|-----------------------------|------------------------------|-----------------------------|-----------------------------|-----------------------------|
|                                                               |          | C10                         | CP15                         | Tu19                        | To21                        | M18                         |
| Leak<br>conductance                                           | pas      | soma, rad, lm,<br>ori, axon | soma, rad,<br>lm, ori, axon  | soma, rad,<br>lm, ori, axon | soma, rad,<br>lm, ori, axon | soma, rad,<br>lm, ori, axon |
| HH<br>mechanism                                               | hha2     | soma, axon                  | soma, axon                   | soma, axon                  |                             |                             |
| HH<br>mechanism                                               | hha_old  | rad, lm, ori                | rad, obl, lm,<br>ori         | rad, obl, lm,<br>ori        |                             |                             |
| H current                                                     | h        | soma, rad, ori              |                              | soma, rad,<br>ori           |                             |                             |
| H current                                                     | hd       |                             |                              |                             | soma, rad,<br>obl, lm, ori  | soma, rad,<br>obl, lm, ori  |
| H current                                                     | hd2      |                             | soma, rad,<br>obl, ori       |                             |                             |                             |
| Na <sup>+</sup> current<br>for axon                           | nax      |                             |                              |                             | soma, rad,<br>lm, ori, axon | soma, rad,<br>lm, ori, axon |
| Proximal A-<br>type K <sup>+</sup><br>current                 | kap      | soma, rad, ori              | soma, rad,<br>obl,ori        | soma, rad,<br>ori           | soma, axon                  | soma, axon                  |
| A-type K <sup>+</sup><br>current                              | kad      | rad, lm, ori                | rad, obl, lm,<br>ori         | rad, obl, lm,<br>ori        | rad, obl, lm,<br>ori        | rad, obl, lm,<br>ori        |
| Delayed<br>rectifier K <sup>+</sup><br>current                | kdr      |                             |                              |                             | soma, rad,<br>lm, ori, axon | soma, rad,<br>lm, ori, axon |
| M-type K <sup>+</sup><br>current                              | km       | soma, rad, ori,<br>axon     | soma, rad,<br>obl, ori, axon | soma, rad,<br>ori, axon     |                             |                             |
| M-type K <sup>+</sup><br>current                              | kmb      |                             |                              |                             | soma, axon                  | soma, axon                  |
| Ca <sup>2+</sup> -activated<br>sAHP K <sup>+</sup><br>current | kca      | soma, rad, ori              | soma, rad,<br>obl, ori       | soma, rad,<br>ori           | soma, rad,<br>obl, lm, ori  | soma, rad,<br>obl, lm, ori  |

|                                                         |         |                |                     |                |                         |                         |
|---------------------------------------------------------|---------|----------------|---------------------|----------------|-------------------------|-------------------------|
| Ca <sup>2+</sup> -activated mAHP K <sup>+</sup> current | mykca   | soma, rad, ori |                     | soma, rad, ori |                         |                         |
| Ca <sup>2+</sup> -activated K <sup>+</sup> current      | cagk    |                |                     |                | soma, rad, obl, lm, ori | soma, rad, obl, lm, ori |
| Ca <sup>2+</sup> -activated K <sup>+</sup> current      | cagk2   |                | soma, rad, obl, ori |                |                         |                         |
| HVA L-type Ca <sup>2+</sup> current                     | cal     | soma           | soma                | soma           | soma, rad, obl, lm, ori | soma, rad, obl, lm, ori |
| HVA L-type Ca <sup>2+</sup> current                     | calH    | rad, ori       | rad, obl, ori       | rad, ori       |                         |                         |
| HVA N-type Ca <sup>2+</sup> current                     | can     |                |                     |                | soma, rad, obl, lm, ori | soma, rad, obl, lm, ori |
| MVA R-type Ca <sup>2+</sup> current                     | somacar | soma           | soma                | soma           |                         |                         |
| MVA R-type Ca <sup>2+</sup> current                     | car     | rad, ori       | rad, obl, ori       | rad, ori       |                         |                         |
| LVA T-type Ca <sup>2+</sup> current                     | cat     | soma, rad, ori | soma, rad, obl, ori | soma, rad, ori | soma, rad, obl, lm, ori | soma, rad, obl, lm, ori |
| Calcium pump                                            | cad     | soma, rad, ori | soma, rad, obl, ori | soma, rad, ori |                         |                         |
| Calcium accumulation                                    | cacum   |                |                     |                | soma, rad, obl, lm, ori | soma, rad, obl, lm, ori |

**Supplementary S4: Somatic Features Test detailed results**

| minimum voltage |                 |                |           |           |            |            |            |            |            |            |           |           |
|-----------------|-----------------|----------------|-----------|-----------|------------|------------|------------|------------|------------|------------|-----------|-----------|
| Step (nA)       | Experiment mean | Experiment std | C10 value | C10 error | CP15 value | CP15 error | Tu19 value | Tu19 error | To21 value | To21 error | M18 value | M18 error |
| -1              | -99.9313        | 9.7377         | -143.502  | 4.474481  | -114.562   | 1.502482   | -139.077   | 4.020009   | -116.241   | 1.674941   | -107.226  | 0.749093  |
| -0.8            | -94.3532        | 8.1946         | -129.832  | 4.329578  | -103.146   | 1.07296    | -125.937   | 3.854259   | -107.22    | 1.570129   | -99.8416  | 0.669758  |
| -0.6            | -88.5859        | 6.8969         | -114.919  | 3.818052  | -91.5606   | 0.431303   | -111.759   | 3.359989   | -98.1312   | 1.384      | -92.372   | 0.548952  |
| -0.4            | -85.2382        | 9.5815         | -98.8119  | 1.416657  | -81.1776   | 0.423797   | -96.6202   | 1.187912   | -89.1218   | 0.405319   | -84.8206  | 0.043588  |
| -0.2            | -77.8483        | 6.489          | -81.5999  | 0.578153  | -72.9466   | 0.755387   | -80.5927   | 0.42293    | -80.4264   | 0.397309   | -77.212   | 0.098053  |

| sag_amplitude |                 |                |           |           |            |            |            |            |            |            |           |           |
|---------------|-----------------|----------------|-----------|-----------|------------|------------|------------|------------|------------|------------|-----------|-----------|
| Step (nA)     | Experiment mean | Experiment std | C10 value | C10 error | CP15 value | CP15 error | Tu19 value | Tu19 error | To21 value | To21 error | M18 value | M18 error |
| -1            | 6.5995          | 3.3034         | 29.70236  | 6.99366   | 19.83881   | 4.007783   | 24.84155   | 5.522205   | 10.50972   | 1.183697   | 8.411166  | 0.548425  |
| -0.8          | 5.2681          | 2.3817         | 26.86898  | 9.069521  | 16.12122   | 4.55688    | 22.8738    | 7.392074   | 8.832507   | 1.496581   | 6.887593  | 0.679973  |
| -0.6          | 4.159           | 1.8053         | 21.3321   | 9.512601  | 10.83257   | 3.696655   | 18.21476   | 7.785829   | 6.662081   | 1.386518   | 5.180959  | 0.566088  |
| -0.4          | 5.3459          | 8.0929         | 13.91442  | 1.05877   | 5.91847    | 0.07075    | 11.74933   | 0.79124    | 4.253484   | 0.134984   | 3.421264  | 0.237818  |
| -0.2          | 2.8362          | 4.2211         | 5.934662  | 0.734041  | 2.560699   | 0.065268   | 4.794064   | 0.463828   | 1.926938   | 0.215409   | 1.705372  | 0.267899  |

| sag_ratio1 |                 |                |           |           |            |            |            |            |            |            |           |           |
|------------|-----------------|----------------|-----------|-----------|------------|------------|------------|------------|------------|------------|-----------|-----------|
| Step (nA)  | Experiment mean | Experiment std | C10 value | C10 error | CP15 value | CP15 error | Tu19 value | Tu19 error | To21 value | To21 error | M18 value | M18 error |
| -1         | 0.2087          | 0.0645         | 0.37262   | 2.541388  | 0.411113   | 3.138189   | 0.335229   | 1.961684   | 0.239728   | 0.481059   | 0.223746  | 0.233264  |
| -0.8       | 0.2082          | 0.064          | 0.406845  | 3.103836  | 0.437601   | 3.584394   | 0.375204   | 2.609435   | 0.253672   | 0.710507   | 0.228003  | 0.309414  |
| -0.6       | 0.2144          | 0.0623         | 0.417225  | 3.255624  | 0.42893    | 3.443502   | 0.389323   | 2.807746   | 0.258923   | 0.714653   | 0.227847  | 0.215841  |
| -0.4       | 0.2526          | 0.1541         | 0.397308  | 0.939053  | 0.397963   | 0.943305   | 0.371267   | 0.770067   | 0.254387   | 0.011595   | 0.22527   | 0.17735   |
| -0.2       | 0.257           | 0.0941         | 0.333225  | 0.81004   | 0.385595   | 1.366581   | 0.306937   | 0.53068    | 0.24011    | 0.179485   | 0.225017  | 0.339878  |

| sag_ratio2 |                 |                |           |           |            |            |            |            |            |            |           |           |
|------------|-----------------|----------------|-----------|-----------|------------|------------|------------|------------|------------|------------|-----------|-----------|
| Step (nA)  | Experiment mean | Experiment std | C10 value | C10 error | CP15 value | CP15 error | Tu19 value | Tu19 error | To21 value | To21 error | M18 value | M18 error |
| -1         | 0.7913          | 0.0645         | 0.62738   | 2.541388  | 0.588887   | 3.138189   | 0.664771   | 1.961684   | 0.760272   | 0.481059   | 0.776254  | 0.233264  |
| -0.8       | 0.7918          | 0.064          | 0.593155  | 3.103836  | 0.562399   | 3.584394   | 0.624796   | 2.609435   | 0.746328   | 0.710507   | 0.771997  | 0.309414  |
| -0.6       | 0.7856          | 0.0623         | 0.582775  | 3.255624  | 0.57107    | 3.443502   | 0.610677   | 2.807746   | 0.741077   | 0.714653   | 0.772153  | 0.215841  |
| -0.4       | 0.7474          | 0.1541         | 0.602692  | 0.939053  | 0.602037   | 0.943305   | 0.628733   | 0.770067   | 0.745613   | 0.011595   | 0.77473   | 0.17735   |
| -0.2       | 0.743           | 0.0941         | 0.666775  | 0.81004   | 0.614405   | 1.366581   | 0.693063   | 0.53068    | 0.75989    | 0.179485   | 0.774983  | 0.339878  |

| steady_state_hyper |                 |                |           |           |            |            |            |            |            |            |           |           |
|--------------------|-----------------|----------------|-----------|-----------|------------|------------|------------|------------|------------|------------|-----------|-----------|
| Step (nA)          | Experiment mean | Experiment std | C10 value | C10 error | CP15 value | CP15 error | Tu19 value | Tu19 error | To21 value | To21 error | M18 value | M18 error |
| -1                 | -93.2488        | 7.4089         | -113.8    | 2.773865  | -94.7232   | 0.199005   | -114.235   | 2.83262    | -105.733   | 1.68497    | -98.8149  | 0.751271  |
| -0.8               | -89.0217        | 6.3605         | -102.963  | 2.191916  | -87.0245   | 0.314008   | -103.064   | 2.207658   | -98.3877   | 1.472522   | -92.9541  | 0.618254  |
| -0.6               | -84.475         | 5.6016         | -93.5865  | 1.626593  | -80.728    | 0.668919   | -93.5447   | 1.619118   | -91.4692   | 1.248603   | -87.1909  | 0.484847  |
| -0.4               | -79.8991        | 4.9027         | -84.8975  | 1.019515  | -75.2591   | 0.946413   | -84.8709   | 1.014085   | -84.8682   | 1.013534   | -81.3991  | 0.305945  |
| -0.2               | -75.0316        | 4.5793         | -75.6653  | 0.138378  | -70.3858   | 1.014512   | -75.7986   | 0.167499   | -78.4994   | 0.757272   | -75.5064  | 0.103679  |

| steady_state_voltage |                 |                |           |           |            |            |            |            |            |            |           |           |
|----------------------|-----------------|----------------|-----------|-----------|------------|------------|------------|------------|------------|------------|-----------|-----------|
| Step (nA)            | Experiment mean | Experiment std | C10 value | C10 error | CP15 value | CP15 error | Tu19 value | Tu19 error | To21 value | To21 error | M18 value | M18 error |
| -1                   | -69.5976        | 3.9296         | -62.4239  | 1.825554  | -65.6239   | 1.011228   | -63.8388   | 1.465497   | -71.425    | 0.465036   | -68.4643  | 0.288407  |
| -0.8                 | -69.6693        | 3.8566         | -62.4762  | 1.865148  | -65.6313   | 1.047033   | -63.7841   | 1.52602    | -71.5044   | 0.475843   | -68.5947  | 0.278649  |
| -0.6                 | -69.5911        | 3.989          | -62.6098  | 1.750147  | -65.7119   | 0.972474   | -63.8513   | 1.438906   | -71.6485   | 0.515776   | -68.7731  | 0.205076  |
| -0.4                 | -69.5138        | 4.1133         | -62.7529  | 1.643677  | -65.8523   | 0.890152   | -64.1807   | 1.296552   | -71.8579   | 0.569886   | -69.004   | 0.12393   |
| -0.2                 | -69.454         | 4.2827         | -63.3324  | 1.429384  | -66.0392   | 0.797343   | -64.6143   | 1.130061   | -72.1189   | 0.622241   | -69.2908  | 0.038097  |
| 0.2                  | -69.5194        | 4.2995         | -63.1246  | 1.487343  | -66.8658   | 0.617196   | -65.019    | 1.046737   | -72.6744   | 0.733813   | -70.0288  | 0.118477  |

|     |          |        |          |          |          |          |          |          |          |          |          |          |
|-----|----------|--------|----------|----------|----------|----------|----------|----------|----------|----------|----------|----------|
| 0.4 | -69.9092 | 4.3278 | -62.4665 | 1.71975  | -67.7537 | 0.498056 | -65.2082 | 1.086224 | -72.9296 | 0.697906 | -70.5483 | 0.147685 |
| 0.6 | -70.4804 | 4.4183 | -63.1015 | 1.670079 | -69.4552 | 0.232045 | -65.1616 | 1.203817 | -73.1886 | 0.612942 | -70.9008 | 0.095145 |
| 0.8 | -71.0353 | 4.5287 | -63.0051 | 1.773178 | -70.3308 | 0.155573 | -65.0142 | 1.329549 | -73.7491 | 0.599241 | -71.3203 | 0.062926 |
| 1   | -71.4634 | 4.6282 | -62.8556 | 1.859862 | -68.8692 | 0.560524 | -64.8954 | 1.419117 | -75.1967 | 0.806631 | -72.2052 | 0.160283 |

| steady_state_voltage_stimed |                 |                |           |           |            |            |            |            |            |            |           |           |
|-----------------------------|-----------------|----------------|-----------|-----------|------------|------------|------------|------------|------------|------------|-----------|-----------|
| Step (nA)                   | Experiment mean | Experiment std | C10 value | C10 error | CP15 value | CP15 error | Tu19 value | Tu19 error | To21 value | To21 error | M18 value | M18 error |
| -1                          | -93.3319        | 7.415          | -113.8    | 2.760376  | -94.7232   | 0.187634   | -114.235   | 2.819082   | -105.732   | 1.672252   | -98.8146  | 0.739403  |
| -0.8                        | -89.0851        | 6.3924         | -102.963  | 2.17106   | -87.0245   | 0.322359   | -103.064   | 2.186724   | -98.3873   | 1.455193   | -92.954   | 0.605235  |
| -0.6                        | -84.4268        | 5.6363         | -93.5865  | 1.625131  | -80.728    | 0.656249   | -93.5447   | 1.617702   | -91.4691   | 1.24946    | -87.191   | 0.490429  |
| -0.4                        | -79.8923        | 4.9452         | -84.8975  | 1.012128  | -75.2591   | 0.936904   | -84.8709   | 1.006745   | -84.8683   | 1.006224   | -81.3993  | 0.304739  |
| -0.2                        | -75.0121        | 4.6192         | -75.6653  | 0.141404  | -70.3859   | 1.001517   | -75.7986   | 0.170274   | -78.4995   | 0.754979   | -75.5067  | 0.107067  |

| voltage_after_stim |                 |                |           |           |            |            |            |            |            |            |           |           |
|--------------------|-----------------|----------------|-----------|-----------|------------|------------|------------|------------|------------|------------|-----------|-----------|
| Step (nA)          | Experiment mean | Experiment std | C10 value | C10 error | CP15 value | CP15 error | Tu19 value | Tu19 error | To21 value | To21 error | M18 value | M18 error |
| -1                 | -69.3894        | 3.9679         | -63.5579  | 1.469665  | -66.1671   | 0.812099   | -64.746    | 1.170237   | -71.9566   | 0.646996   | -69.0578  | 0.083559  |
| -0.8               | -69.466         | 3.8948         | -63.6235  | 1.50008   | -66.1689   | 0.846545   | -64.8247   | 1.19166    | -72.0032   | 0.651427   | -69.1014  | 0.093622  |
| -0.6               | -69.3704        | 3.9926         | -63.7122  | 1.417173  | -66.1715   | 0.801202   | -64.5498   | 1.207395   | -72.0678   | 0.675604   | -69.1682  | 0.050646  |
| -0.4               | -69.2686        | 4.1337         | -63.85    | 1.31083   | -66.1808   | 0.746991   | -64.6739   | 1.111534   | -72.1548   | 0.698212   | -69.2685  | 1.8E-05   |
| -0.2               | -69.2831        | 4.3611         | -63.6983  | 1.280596  | -66.2059   | 0.705601   | -64.8275   | 1.021664   | -72.2665   | 0.684092   | -69.418   | 0.030922  |
| 0.2                | -69.6822        | 4.3321         | -63.4454  | 1.439664  | -66.6499   | 0.69997    | -65.2957   | 1.012562   | -72.5532   | 0.662728   | -69.922   | 0.055357  |
| 0.4                | -70.1913        | 4.4134         | -63.2654  | 1.569287  | -67.333    | 0.647648   | -65.4486   | 1.074607   | -72.7184   | 0.572587   | -70.3563  | 0.037392  |
| 0.6                | -70.7661        | 4.4566         | -63.2193  | 1.693388  | -69.8526   | 0.204976   | -65.4991   | 1.181848   | -72.9096   | 0.480962   | -70.5052  | 0.058535  |
| 0.8                | -71.3324        | 4.5909         | -63.1756  | 1.776735  | -70.9258   | 0.088557   | -65.5154   | 1.267082   | -73.1969   | 0.406123   | -70.724   | 0.132533  |
| 1                  | -71.6974        | 4.6722         | -63.1406  | 1.831435  | -68.4495   | 0.695164   | -65.4901   | 1.328552   | -75.0332   | 0.71397    | -71.147   | 0.117812  |



| voltage_base |                 |                |           |           |            |            |            |            |            |            |           |           |
|--------------|-----------------|----------------|-----------|-----------|------------|------------|------------|------------|------------|------------|-----------|-----------|
| Step (nA)    | Experiment mean | Experiment std | C10 value | C10 error | CP15 value | CP15 error | Tu19 value | Tu19 error | To21 value | To21 error | M18 value | M18 error |
| -1           | -69.6021        | 4.3921         | -63.7901  | 1.323274  | -66.3057   | 0.750531   | -64.9736   | 1.053815   | -72.4012   | 0.63731    | -69.6332  | 0.007079  |
| -0.8         | -69.5867        | 4.3825         | -63.7901  | 1.322659  | -66.3057   | 0.748661   | -64.9736   | 1.052609   | -72.4012   | 0.64222    | -69.6332  | 0.010608  |
| -0.6         | -69.4911        | 4.4034         | -63.7901  | 1.294671  | -66.3057   | 0.723397   | -64.9736   | 1.025903   | -72.4012   | 0.660882   | -69.6332  | 0.032268  |
| -0.4         | -69.3713        | 4.352          | -63.7901  | 1.282434  | -66.3057   | 0.704413   | -64.9736   | 1.010492   | -72.4012   | 0.696215   | -69.6332  | 0.060177  |
| -0.2         | -69.3718        | 4.3803         | -63.7901  | 1.274263  | -66.3057   | 0.699976   | -64.9736   | 1.004077   | -72.4012   | 0.691603   | -69.6332  | 0.059674  |
| 0.2          | -69.2003        | 4.4582         | -63.7901  | 1.213528  | -66.3057   | 0.649277   | -64.9736   | 0.948064   | -72.4012   | 0.717986   | -69.6332  | 0.0971    |
| 0.4          | -69.2273        | 4.4598         | -63.7901  | 1.219147  | -66.3057   | 0.655098   | -64.9736   | 0.953778   | -72.4012   | 0.711675   | -69.6332  | 0.091011  |
| 0.6          | -69.5721        | 4.4253         | -63.7901  | 1.306567  | -66.3057   | 0.738121   | -64.9736   | 1.03913    | -72.4012   | 0.639307   | -69.6332  | 0.013805  |
| 0.8          | -69.7343        | 4.4319         | -63.7901  | 1.34122   | -66.3057   | 0.77362    | -64.9736   | 1.07418    | -72.4012   | 0.601757   | -69.6332  | 0.022814  |
| 1            | -69.931         | 4.5857         | -63.7901  | 1.339131  | -66.3057   | 0.790568   | -64.9736   | 1.081048   | -72.4012   | 0.53868    | -69.6332  | 0.064943  |

| voltage_deflection |                 |                |           |           |            |            |            |            |            |            |           |           |
|--------------------|-----------------|----------------|-----------|-----------|------------|------------|------------|------------|------------|------------|-----------|-----------|
| Step (nA)          | Experiment mean | Experiment std | C10 value | C10 error | CP15 value | CP15 error | Tu19 value | Tu19 error | To21 value | To21 error | M18 value | M18 error |
| -1                 | -23.6514        | 5.7217         | -50.0036  | 4.605667  | -28.4319   | 0.835499   | -49.2638   | 4.476368   | -33.1899   | 1.667067   | -29.0974  | 0.95181   |
| -0.8               | -19.3666        | 4.7267         | -39.1669  | 4.189041  | -20.7331   | 0.289107   | -38.092    | 3.961612   | -25.8449   | 1.370582   | -23.2366  | 0.818747  |
| -0.6               | -15.0155        | 3.5413         | -29.7901  | 4.172078  | -14.4366   | 0.163457   | -28.5731   | 3.828423   | -18.9264   | 1.104371   | -17.4734  | 0.694061  |
| -0.4               | -10.4888        | 2.5469         | -21.101   | 4.166724  | -8.96779   | 0.5972     | -19.8993   | 3.694883   | -12.3254   | 0.721103   | -11.6815  | 0.468298  |
| -0.2               | -5.6461         | 1.5728         | -11.8688  | 3.956466  | -4.09451   | 0.986514   | -10.8271   | 3.294106   | -5.9566    | 0.197419   | -5.78882  | 0.090745  |

| voltage_deflection_begin |                 |                |           |           |            |            |            |            |            |            |           |           |
|--------------------------|-----------------|----------------|-----------|-----------|------------|------------|------------|------------|------------|------------|-----------|-----------|
| Step (nA)                | Experiment mean | Experiment std | C10 value | C10 error | CP15 value | CP15 error | Tu19 value | Tu19 error | To21 value | To21 error | M18 value | M18 error |
| -1                       | -27.9145        | 7.2572         | -55.525   | 3.804569  | -37.4865   | 1.318972   | -57.2856   | 4.047173   | -35.5329   | 1.049777   | -32.1209  | 0.579624  |
| -0.8                     | -22.9462        | 6.025          | -44.3134  | 3.546416  | -27.8917   | 0.820833   | -45.6701   | 3.771608   | -28.1468   | 0.863171   | -25.8871  | 0.488108  |

|      |          |        |          |          |          |          |          |          |          |          |          |          |
|------|----------|--------|----------|----------|----------|----------|----------|----------|----------|----------|----------|----------|
| -0.6 | -17.5106 | 4.5662 | -33.9076 | 3.590952 | -18.5854 | 0.235374 | -34.6453 | 3.752512 | -20.8893 | 0.739934 | -19.6405 | 0.466457 |
| -0.4 | -11.9487 | 3.1191 | -23.9453 | 3.846161 | -10.6276 | 0.423554 | -24.0022 | 3.864406 | -13.7577 | 0.579982 | -13.2831 | 0.427818 |
| -0.2 | -6.1813  | 1.6983 | -13.6942 | 4.423765 | -4.54291 | 0.964725 | -13.0238 | 4.029024 | -6.71017 | 0.311411 | -6.69751 | 0.30396  |

| voltage_deflection_vb_ssse |                 |                |           |           |            |            |            |            |            |            |           |           |
|----------------------------|-----------------|----------------|-----------|-----------|------------|------------|------------|------------|------------|------------|-----------|-----------|
| Step (nA)                  | Experiment mean | Experiment std | C10 value | C10 error | CP15 value | CP15 error | Tu19 value | Tu19 error | To21 value | To21 error | M18 value | M18 error |
| -1                         | -23.7298        | 5.8063         | -50.0099  | 4.526143  | -28.4175   | 0.80735    | -49.2618   | 4.397285   | -33.3304   | 1.653484   | -29.1814  | 0.938908  |
| -0.8                       | -19.4985        | 4.6597         | -39.1732  | 4.222318  | -20.7188   | 0.261875   | -38.0899   | 3.989822   | -25.986    | 1.392267   | -23.3208  | 0.820292  |
| -0.6                       | -14.9357        | 3.6064         | -29.7964  | 4.12064   | -14.4223   | 0.142361   | -28.571    | 3.780865   | -19.0679   | 1.145797   | -17.5578  | 0.727073  |
| -0.4                       | -10.521         | 2.5677         | -21.1073  | 4.122883  | -8.95343   | 0.610496   | -19.8972   | 3.651601   | -12.4671   | 0.757898   | -11.7661  | 0.48491   |
| -0.2                       | -5.6403         | 1.549          | -11.8751  | 4.025065  | -4.0802    | 1.007167   | -10.825    | 3.34712    | -6.09827   | 0.295658   | -5.87347  | 0.15053   |

| Spikecount |                 |                |           |           |            |            |            |            |            |            |           |           |
|------------|-----------------|----------------|-----------|-----------|------------|------------|------------|------------|------------|------------|-----------|-----------|
| Step (nA)  | Experiment mean | Experiment std | C10 value | C10 error | CP15 value | CP15 error | Tu19 value | Tu19 error | To21 value | To21 error | M18 value | M18 error |
| 0.2        | 1.4774          | 2.0734         | 32        | 14.72104  | 0          | 0.712549   | 23         | 10.38034   | 0          | 0.712549   | 0         | 0.712549  |
| 0.4        | 3.9763          | 3.3616         | 47        | 12.79858  | 1          | 0.885382   | 37         | 9.823804   | 0          | 1.182859   | 3         | 0.290427  |
| 0.6        | 6.6785          | 4.0206         | 56        | 12.2672   | 1          | 1.412351   | 45         | 9.531289   | 1          | 1.412351   | 9         | 0.577401  |
| 0.8        | 9.3075          | 4.1665         | 62        | 12.64671  | 1          | 1.99388    | 54         | 10.72663   | 4          | 1.273851   | 12        | 0.646226  |
| 1          | 11.325          | 4.6197         | 73        | 13.35043  | 3          | 1.802065   | 59         | 10.31993   | 15         | 0.795506   | 16        | 1.01197   |

| Spikecount_stimint |                 |                |           |           |            |            |            |            |            |            |           |           |
|--------------------|-----------------|----------------|-----------|-----------|------------|------------|------------|------------|------------|------------|-----------|-----------|
| Step (nA)          | Experiment mean | Experiment std | C10 value | C10 error | CP15 value | CP15 error | Tu19 value | Tu19 error | To21 value | To21 error | M18 value | M18 error |
| 0.2                | 1.4774          | 2.0734         | 32        | 14.72104  | 0          | 0.712549   | 23         | 10.38034   | 0          | 0.712549   | 0         | 0.712549  |
| 0.4                | 3.9763          | 3.3616         | 46        | 12.5011   | 1          | 0.885382   | 37         | 9.823804   | 0          | 1.182859   | 3         | 0.290427  |
| 0.6                | 6.6785          | 4.0206         | 56        | 12.2672   | 1          | 1.412351   | 45         | 9.531289   | 1          | 1.412351   | 9         | 0.577401  |

|     |        |        |    |          |   |          |    |          |    |          |    |          |
|-----|--------|--------|----|----------|---|----------|----|----------|----|----------|----|----------|
| 0.8 | 9.3075 | 4.1665 | 62 | 12.64671 | 1 | 1.99388  | 54 | 10.72663 | 4  | 1.273851 | 12 | 0.646226 |
| 1   | 11.325 | 4.6197 | 73 | 13.35043 | 3 | 1.802065 | 59 | 10.31993 | 15 | 0.795506 | 16 | 1.01197  |

| inv_time_to_first_spike |                 |                |           |           |            |            |            |            |            |            |           |           |
|-------------------------|-----------------|----------------|-----------|-----------|------------|------------|------------|------------|------------|------------|-----------|-----------|
| Step (nA)               | Experiment mean | Experiment std | C10 value | C10 error | CP15 value | CP15 error | Tu19 value | Tu19 error | To21 value | To21 error | M18 value | M18 error |
| 0.2                     | 23.5725         | 33.9424        | 217.3913  | 5.710227  | 0          | 0.694485   | 128.2051   | 3.082653   | 0          | 0.694485   | 0         | 0.694485  |
| 0.4                     | 59.1824         | 66.4808        | 400       | 5.126557  | 123.4568   | 0.966811   | 285.7143   | 3.407478   | 0          | 0.890218   | 93.45794  | 0.515571  |
| 0.6                     | 97.5343         | 89.619         | 555.5556  | 5.110761  | 263.1579   | 1.848086   | 400        | 3.375018   | 113.6364   | 0.179672   | 169.4915  | 0.802924  |
| 0.8                     | 148.3142        | 114.7306       | 714.2857  | 4.933048  | 370.3704   | 1.935457   | 526.3158   | 3.294689   | 200        | 0.450497   | 250       | 0.886301  |
| 1                       | 196.2319        | 136.6747       | 833.3333  | 4.661444  | 454.5455   | 1.889988   | 625        | 3.137143   | 277.7778   | 0.596642   | 322.5806  | 0.924449  |

| inv_first_ISI |                 |                |           |           |            |            |            |            |            |            |           |           |
|---------------|-----------------|----------------|-----------|-----------|------------|------------|------------|------------|------------|------------|-----------|-----------|
| Step (nA)     | Experiment mean | Experiment std | C10 value | C10 error | CP15 value | CP15 error | Tu19 value | Tu19 error | To21 value | To21 error | M18 value | M18 error |
| 0.2           | 14.0118         | 23.7191        | 87.7193   | 3.107517  | 0          | 0.590739   | 64.51613   | 2.129268   | 0          | 0.590739   | 0         | 0.590739  |
| 0.4           | 40.8817         | 40.4993        | 131.5789  | 2.239477  | 0          | 1.009442   | 100        | 1.459736   | 0          | 1.009442   | 27.70083  | 0.325459  |
| 0.6           | 68.5665         | 47.4419        | 113.6364  | 0.950001  | 0          | 1.445273   | 128.2051   | 1.257088   | 0          | 1.445273   | 53.47594  | 0.318085  |
| 0.8           | 93.8851         | 46.4426        | 46.08295  | 1.029274  | 0          | 2.02153    | 151.5152   | 1.240888   | 47.61905   | 0.996199   | 72.46377  | 0.461243  |
| 1             | 116.3015        | 43.2083        | 68.96552  | 1.09553   | 7.782101   | 2.511541   | 185.1852   | 1.594223   | 87.7193    | 0.661498   | 90.90909  | 0.587674  |

| inv_second_ISI |                 |                |           |           |            |            |            |            |            |            |           |           |
|----------------|-----------------|----------------|-----------|-----------|------------|------------|------------|------------|------------|------------|-----------|-----------|
| Step (nA)      | Experiment mean | Experiment std | C10 value | C10 error | CP15 value | CP15 error | Tu19 value | Tu19 error | To21 value | To21 error | M18 value | M18 error |
| 0.2            | 4.5983          | 8.9653         | 83.33333  | 8.782197  | 0          | 0.5129     | 58.47953   | 6.009975   | 0          | 0.5129     | 0         | 0.5129    |
| 0.4            | 20.0842         | 21.6747        | 212.766   | 8.889708  | 0          | 0.92662    | 96.15385   | 3.509605   | 0          | 0.92662    | 7.401925  | 0.585119  |
| 0.6            | 41.8257         | 29.8653        | 238.0952  | 6.571825  | 0          | 1.400478   | 204.0816   | 5.432925   | 0          | 1.400478   | 34.60208  | 0.241873  |
| 0.8            | 62.9663         | 30.2882        | 178.5714  | 3.816837  | 0          | 2.078905   | 222.2222   | 5.258019   | 6.23053    | 1.873197   | 54.94505  | 0.264831  |

|   |         |         |     |          |          |          |          |          |          |          |          |          |
|---|---------|---------|-----|----------|----------|----------|----------|----------|----------|----------|----------|----------|
| 1 | 80.6491 | 31.1475 | 250 | 5.437062 | 5.574136 | 2.410305 | 112.3596 | 1.018074 | 82.64463 | 0.064067 | 74.07407 | 0.211093 |
|---|---------|---------|-----|----------|----------|----------|----------|----------|----------|----------|----------|----------|

| inv_third_ISI |                 |                |           |           |            |            |            |            |            |            |           |           |
|---------------|-----------------|----------------|-----------|-----------|------------|------------|------------|------------|------------|------------|-----------|-----------|
| Step (nA)     | Experiment mean | Experiment std | C10 value | C10 error | CP15 value | CP15 error | Tu19 value | Tu19 error | To21 value | To21 error | M18 value | M18 error |
| 0.2           | 2.4873          | 5.8108         | 78.74016  | 13.12261  | 0          | 0.428048   | 56.49718   | 9.29474    | 0          | 0.428048   | 0         | 0.428048  |
| 0.4           | 12.5847         | 14.2164        | 232.5581  | 15.47322  | 0          | 0.885224   | 92.59259   | 5.627859   | 0          | 0.885224   | 0         | 0.885224  |
| 0.6           | 25.5306         | 19.4195        | 238.0952  | 10.94594  | 0          | 1.314689   | 117.6471   | 4.743503   | 0          | 1.314689   | 21.36752  | 0.214376  |
| 0.8           | 39.8159         | 20.768         | 144.9275  | 5.061231  | 0          | 1.917175   | 196.0784   | 7.524197   | 8.673027   | 1.499561   | 38.16794  | 0.079351  |
| 1             | 53.2365         | 20.1677        | 227.2727  | 8.629453  | 0          | 2.639691   | 106.383    | 2.635228   | 64.10256   | 0.538785   | 56.81818  | 0.177595  |

| inv_fourth_ISI |                 |                |           |           |            |            |            |            |            |            |           |           |
|----------------|-----------------|----------------|-----------|-----------|------------|------------|------------|------------|------------|------------|-----------|-----------|
| Step (nA)      | Experiment mean | Experiment std | C10 value | C10 error | CP15 value | CP15 error | Tu19 value | Tu19 error | To21 value | To21 error | M18 value | M18 error |
| 0.2            | 1.2653          | 4.6328         | 77.51938  | 16.45961  | 0          | 0.273118   | 56.17978   | 11.85341   | 0          | 0.273118   | 0         | 0.273118  |
| 0.4            | 8.7874          | 12.1634        | 227.2727  | 17.96252  | 0          | 0.722446   | 91.74312   | 6.820109   | 0          | 0.722446   | 0         | 0.722446  |
| 0.6            | 18.5295         | 16.8817        | 181.8182  | 9.672526  | 0          | 1.097609   | 57.14286   | 2.287291   | 0          | 1.097609   | 19.53125  | 0.059339  |
| 0.8            | 30.6315         | 16.9188        | 142.8571  | 6.633192  | 0          | 1.810501   | 250        | 12.96596   | 0          | 1.810501   | 29.15452  | 0.087298  |
| 1              | 40.7579         | 15.8266        | 200       | 10.06167  | 0          | 2.575278   | 172.4138   | 8.318647   | 48.30918   | 0.477126   | 46.2963   | 0.349942  |

| inv_fifth_ISI |                 |                |           |           |            |            |            |            |            |            |           |           |
|---------------|-----------------|----------------|-----------|-----------|------------|------------|------------|------------|------------|------------|-----------|-----------|
| Step (nA)     | Experiment mean | Experiment std | C10 value | C10 error | CP15 value | CP15 error | Tu19 value | Tu19 error | To21 value | To21 error | M18 value | M18 error |
| 0.2           | 0.6903          | 3.5827         | 77.51938  | 21.44446  | 0          | 0.192676   | 56.17978   | 15.48817   | 0          | 0.192676   | 0         | 0.192676  |
| 0.4           | 6.3819          | 10.3146        | 151.5152  | 14.07066  | 0          | 0.618725   | 90.90909   | 8.194907   | 0          | 0.618725   | 0         | 0.618725  |
| 0.6           | 14.6701         | 15.6837        | 138.8889  | 7.920248  | 0          | 0.935372   | 99.0099    | 5.377545   | 0          | 0.935372   | 19.49318  | 0.307522  |
| 0.8           | 24.9452         | 18.1057        | 147.0588  | 6.744485  | 0          | 1.377754   | 86.95652   | 3.424961   | 0          | 1.377754   | 26.38522  | 0.079534  |
| 1             | 34.2529         | 17.3915        | 166.6667  | 7.613706  | 0          | 1.96952    | 138.8889   | 6.016502   | 38.75969   | 0.259138   | 39.84064  | 0.321291  |

| inv_last_ISI |                 |                |           |           |            |            |            |            |            |            |           |           |
|--------------|-----------------|----------------|-----------|-----------|------------|------------|------------|------------|------------|------------|-----------|-----------|
| Step (nA)    | Experiment mean | Experiment std | C10 value | C10 error | CP15 value | CP15 error | Tu19 value | Tu19 error | To21 value | To21 error | M18 value | M18 error |
| 0.2          | 6.2691          | 17.9501        | 78.125    | 4.003092  | 0          | 0.349252   | 55.55556   | 2.745748   | 0          | 0.349252   | 0         | 0.349252  |
| 0.4          | 8.1811          | 6.6758         | 111.1111  | 15.41838  | 0          | 1.225486   | 90.90909   | 12.39222   | 0          | 1.225486   | 7.401925  | 0.116716  |
| 0.6          | 12.8949         | 7.5643         | 138.8889  | 16.6564   | 0          | 1.704705   | 113.6364   | 13.31802   | 0          | 1.704705   | 19.49318  | 0.872292  |
| 0.8          | 17.3649         | 6.667          | 163.9344  | 21.98433  | 0          | 2.604605   | 133.3333   | 17.3944    | 8.673027   | 1.303716   | 25.97403  | 1.291304  |
| 1            | 21.0827         | 7.7745         | 185.1852  | 21.10779  | 5.574136   | 1.994799   | 149.2537   | 16.48608   | 30.95975   | 1.270442   | 33.44482  | 1.590085  |

| maximum_voltage |                 |                |           |           |            |            |            |            |            |            |           |           |
|-----------------|-----------------|----------------|-----------|-----------|------------|------------|------------|------------|------------|------------|-----------|-----------|
| Step (nA)       | Experiment mean | Experiment std | C10 value | C10 error | CP15 value | CP15 error | Tu19 value | Tu19 error | To21 value | To21 error | M18 value | M18 error |
| 0.2             | -19.8966        | 44.7483        | 17.05651  | 0.825799  | -60.6518   | 0.910765   | 14.41184   | 0.766698   | -65.2766   | 1.014116   | -61.7413  | 0.935113  |
| 0.4             | 9.3048          | 37.7778        | 17.13169  | 0.207182  | 11.18398   | 0.049743   | 15.16358   | 0.155085   | -58.5645   | 1.79654    | 38.04696  | 0.760821  |
| 0.6             | 29.5141         | 10.1374        | 17.06687  | 1.227852  | 10.89965   | 1.836216   | 14.74341   | 1.457049   | 25.16374   | 0.42914    | 38.10062  | 0.847014  |
| 0.8             | 30.4901         | 7.6295         | 17.80262  | 1.66295   | 11.63042   | 2.471941   | 15.49157   | 1.96586    | 25.32588   | 0.676875   | 37.44165  | 0.911141  |
| 1               | 29.4959         | 8.0014         | 19.21274  | 1.28517   | 12.3398    | 2.144138   | 16.27486   | 1.652341   | 23.18031   | 0.78931    | 37.24258  | 0.968165  |

| maximum_voltage_from_voltagebase |                 |                |           |           |            |            |            |            |            |            |           |           |
|----------------------------------|-----------------|----------------|-----------|-----------|------------|------------|------------|------------|------------|------------|-----------|-----------|
| Step (nA)                        | Experiment mean | Experiment std | C10 value | C10 error | CP15 value | CP15 error | Tu19 value | Tu19 error | To21 value | To21 error | M18 value | M18 error |
| 0.2                              | 49.3037         | 44.0619        | 80.84666  | 0.715878  | 5.653893   | 0.990647   | 79.38548   | 0.682716   | 7.124662   | 0.957268   | 7.891874  | 0.939856  |
| 0.4                              | 78.5321         | 37.0959        | 80.92184  | 0.06442   | 77.48968   | 0.028101   | 80.13722   | 0.043269   | 13.83669   | 1.744004   | 107.6802  | 0.785749  |
| 0.6                              | 99.0862         | 11.1674        | 80.85702  | 1.632357  | 77.20534   | 1.959351   | 79.71705   | 1.734437   | 97.56497   | 0.136221   | 107.7338  | 0.774362  |
| 0.8                              | 100.2244        | 7.9104         | 81.59277  | 2.355334  | 77.93612   | 2.817592   | 80.46521   | 2.497875   | 97.72711   | 0.315697   | 107.0748  | 0.866004  |
| 1                                | 99.4269         | 7.9299         | 83.00289  | 2.07115   | 78.64549   | 2.62064    | 81.2485    | 2.292387   | 95.58154   | 0.484919   | 106.8758  | 0.939339  |

| number_initial_spikes |                 |                |           |           |            |            |            |            |            |            |           |           |
|-----------------------|-----------------|----------------|-----------|-----------|------------|------------|------------|------------|------------|------------|-----------|-----------|
| Step (nA)             | Experiment mean | Experiment std | C10 value | C10 error | CP15 value | CP15 error | Tu19 value | Tu19 error | To21 value | To21 error | M18 value | M18 error |
| 0.2                   | 0.4903          | 0.7617         | 3         | 3.294867  | 0          | 0.643692   | 2          | 1.982014   | 0          | 0.643692   | 0         | 0.643692  |
| 0.4                   | 1.0097          | 1.0759         | 6         | 4.638256  | 1          | 0.009016   | 4          | 2.779348   | 0          | 0.93847    | 1         | 0.009016  |
| 0.6                   | 1.7879          | 1.2638         | 6         | 3.332885  | 1          | 0.623437   | 4          | 1.750356   | 1          | 0.623437   | 2         | 0.167827  |
| 0.8                   | 2.35            | 1.2058         | 4         | 1.368386  | 1          | 1.119589   | 6          | 3.027036   | 2          | 0.290264   | 3         | 0.539061  |
| 1                     | 3.0742          | 0.9131         | 6         | 3.204249  | 1          | 2.271602   | 6          | 3.204249   | 3          | 0.081262   | 3         | 0.081262  |

| AHP1_depth_from_peak |                 |                |           |           |            |            |            |            |            |            |           |           |
|----------------------|-----------------|----------------|-----------|-----------|------------|------------|------------|------------|------------|------------|-----------|-----------|
| Step (nA)            | Experiment mean | Experiment std | C10 value | C10 error | CP15 value | CP15 error | Tu19 value | Tu19 error | To21 value | To21 error | M18 value | M18 error |
| 0.8                  | 92.1793         | 4.917          | 53.45427  | 7.875744  | 79.92442   | 2.49235    | 60.7462    | 6.39274    | 80.74757   | 2.324939   | 95.95562  | 0.768012  |
| 1                    | 91.6409         | 4.9559         | 52.86194  | 7.824808  | 78.80065   | 2.590902   | 55.6124    | 7.26982    | 72.99292   | 3.762783   | 91.81418  | 0.034965  |

| AHP2_depth_from_peak |                 |                |           |           |            |            |            |            |            |            |           |           |
|----------------------|-----------------|----------------|-----------|-----------|------------|------------|------------|------------|------------|------------|-----------|-----------|
| Step (nA)            | Experiment mean | Experiment std | C10 value | C10 error | CP15 value | CP15 error | Tu19 value | Tu19 error | To21 value | To21 error | M18 value | M18 error |
| 0.8                  | 82.8879         | 8.2237         | 42.47975  | 4.913621  |            |            | 47.16344   | 4.344086   | 78.57216   | 0.524792   | 98.16248  | 1.857386  |
| 1                    | 79.8599         | 8.0481         | 18.95082  | 7.568132  | 77.40772   | 0.304691   | 23.71602   | 6.976042   | 60.52692   | 2.402179   | 90.82322  | 1.362225  |

| AHP_depth |                 |                |           |           |            |            |            |            |            |            |           |           |
|-----------|-----------------|----------------|-----------|-----------|------------|------------|------------|------------|------------|------------|-----------|-----------|
| Step (nA) | Experiment mean | Experiment std | C10 value | C10 error | CP15 value | CP15 error | Tu19 value | Tu19 error | To21 value | To21 error | M18 value | M18 error |
| 0.8       | 11.673          | 4.0636         | 15.32397  | 0.898458  | -1.9883    | 3.361871   | 14.67699   | 0.739244   | 14.94095   | 0.804202   | 5.458804  | 1.529234  |
| 1         | 12.5085         | 4.6265         | 18.29296  | 1.250289  | -0.92749   | 2.904137   | 16.84044   | 0.936331   | 17.17374   | 1.008374   | 7.58971   | 1.063177  |

| AHP_depth_abs |  |  |  |  |  |  |  |  |  |  |  |  |
|---------------|--|--|--|--|--|--|--|--|--|--|--|--|
|---------------|--|--|--|--|--|--|--|--|--|--|--|--|

| Step (nA) | Experiment mean | Experiment std | C10 value | C10 error | CP15 value | CP15 error | Tu19 value | Tu19 error | To21 value | To21 error | M18 value | M18 error |
|-----------|-----------------|----------------|-----------|-----------|------------|------------|------------|------------|------------|------------|-----------|-----------|
| 0.8       | -58.0613        | 5.8413         | -48.4662  | 1.642635  | -68.294    | 1.751783   | -50.2966   | 1.329268   | -57.4603   | 0.102893   | -64.1744  | 1.046529  |
| 1         | -57.4225        | 6.6545         | -45.4972  | 1.792068  | -67.2332   | 1.474293   | -48.1332   | 1.395942   | -55.2275   | 0.329854   | -62.0435  | 0.694414  |

| AHP_depth_diff |                 |                |           |           |            |            |            |            |            |            |           |           |
|----------------|-----------------|----------------|-----------|-----------|------------|------------|------------|------------|------------|------------|-----------|-----------|
| Step (nA)      | Experiment mean | Experiment std | C10 value | C10 error | CP15 value | CP15 error | Tu19 value | Tu19 error | To21 value | To21 error | M18 value | M18 error |
| 0.8            | 0.4578          | 0.2903         | -0.20813  | 2.293947  |            |            | -0.40245   | 2.963298   | -1.07706   | 5.287155   | -0.59906  | 3.640572  |
| 1              | 0.4563          | 0.3038         | -0.45688  | 3.005843  | -0.61474   | 3.525482   | -0.15819   | 2.022668   | -0.48096   | 3.085114   | -0.58831  | 3.438495  |

| AHP_depth_from_peak |                 |                |           |           |            |            |            |            |            |            |           |           |
|---------------------|-----------------|----------------|-----------|-----------|------------|------------|------------|------------|------------|------------|-----------|-----------|
| Step (nA)           | Experiment mean | Experiment std | C10 value | C10 error | CP15 value | CP15 error | Tu19 value | Tu19 error | To21 value | To21 error | M18 value | M18 error |
| 0.8                 | 81.4373         | 8.7435         | 62.94088  | 2.115448  | 79.92442   | 0.173029   | 62.85901   | 2.124811   | 79.62343   | 0.207453   | 101.2524  | 2.266267  |
| 1                   | 77.2394         | 9.281          | 54.84437  | 2.412998  | 77.77065   | 0.057241   | 60.23919   | 1.831722   | 74.95904   | 0.245702   | 98.49897  | 2.290655  |

| AHP_time_from_peak |                 |                |           |           |            |            |            |            |            |            |           |           |
|--------------------|-----------------|----------------|-----------|-----------|------------|------------|------------|------------|------------|------------|-----------|-----------|
| Step (nA)          | Experiment mean | Experiment std | C10 value | C10 error | CP15 value | CP15 error | Tu19 value | Tu19 error | To21 value | To21 error | M18 value | M18 error |
| 0.8                | 2.1146          | 0.2597         | 4.191935  | 7.998981  | 8.5        | 24.5876    | 4.575926   | 9.477574   | 7.725      | 21.60339   | 6.908333  | 18.45873  |
| 1                  | 2.2066          | 0.2753         | 3.846575  | 5.957048  | 7.3        | 18.50127   | 4.354237   | 7.80108    | 7.066667   | 17.65371   | 6.5375    | 15.73157  |

| AP1_peak  |                 |                |           |           |            |            |            |            |            |            |           |           |
|-----------|-----------------|----------------|-----------|-----------|------------|------------|------------|------------|------------|------------|-----------|-----------|
| Step (nA) | Experiment mean | Experiment std | C10 value | C10 error | CP15 value | CP15 error | Tu19 value | Tu19 error | To21 value | To21 error | M18 value | M18 error |
| 0.8       | 30.4901         | 7.6295         | 17.80262  | 1.66295   | 11.63042   | 2.471941   | 15.49157   | 1.96586    | 25.32588   | 0.676875   | 37.26235  | 0.887641  |
| 1         | 29.4878         | 8.0018         | 19.21274  | 1.284094  | 12.3398    | 2.143018   | 16.27486   | 1.651246   | 23.18031   | 0.788258   | 37.24258  | 0.969129  |

| AP2_AP1_peak_diff |                 |                |           |           |            |            |            |            |            |            |           |           |
|-------------------|-----------------|----------------|-----------|-----------|------------|------------|------------|------------|------------|------------|-----------|-----------|
| Step (nA)         | Experiment mean | Experiment std | C10 value | C10 error | CP15 value | CP15 error | Tu19 value | Tu19 error | To21 value | To21 error | M18 value | M18 error |
| 0.8               | -4.2233         | 2.8446         | -24.0869  | 6.982932  |            |            | -6.7832    | 0.899915   | -4.02435   | 0.069939   | -0.32377  | 1.370853  |
| 1                 | -5.6801         | 3.1828         | -38.2749  | 10.24093  | -2.48044   | 1.005297   | -27.2139   | 6.765666   | -13.5833   | 2.483103   | -3.51317  | 0.680826  |

| AP2_amp   |                 |                |           |           |            |            |            |            |            |            |           |           |
|-----------|-----------------|----------------|-----------|-----------|------------|------------|------------|------------|------------|------------|-----------|-----------|
| Step (nA) | Experiment mean | Experiment std | C10 value | C10 error | CP15 value | CP15 error | Tu19 value | Tu19 error | To21 value | To21 error | M18 value | M18 error |
| 0.8       | 77.7102         | 7.0102         | 24.59139  | 7.57736   |            |            | 51.95838   | 3.673479   | 67.87002   | 1.403694   | 83.10238  | 0.76919   |
| 1         | 75.764          | 7.0631         | 11.37635  | 9.116061  | 64.26596   | 1.627903   | 27.70747   | 6.803887   | 53.06723   | 3.213429   | 78.59207  | 0.4004    |

| AP2_begin_voltage |                 |                |           |           |            |            |            |            |            |            |           |           |
|-------------------|-----------------|----------------|-----------|-----------|------------|------------|------------|------------|------------|------------|-----------|-----------|
| Step (nA)         | Experiment mean | Experiment std | C10 value | C10 error | CP15 value | CP15 error | Tu19 value | Tu19 error | To21 value | To21 error | M18 value | M18 error |
| 0.8               | -51.4433        | 7.0197         | -30.8757  | 2.92998   |            |            | -43.25     | 1.167186   | -46.5685   | 0.694447   | -46.1638  | 0.752099  |
| 1                 | -51.9563        | 7.6988         | -30.4386  | 2.794949  | -54.4066   | 0.318271   | -38.6465   | 1.72882    | -43.4702   | 1.102258   | -44.8627  | 0.921396  |

| AP2_begin_width |                 |                |           |           |            |            |            |            |            |            |           |           |
|-----------------|-----------------|----------------|-----------|-----------|------------|------------|------------|------------|------------|------------|-----------|-----------|
| Step (nA)       | Experiment mean | Experiment std | C10 value | C10 error | CP15 value | CP15 error | Tu19 value | Tu19 error | To21 value | To21 error | M18 value | M18 error |
| 0.8             | 2.0749          | 0.537          | 1.7       | 0.698138  |            |            | 4.2        | 3.957356   | 2.5        | 0.79162    | 3.1       | 1.908939  |
| 1               | 2.2177          | 0.5446         | 2.1       | 0.216122  | 3.3        | 1.98733    | 3.3        | 1.98733    | 2.1        | 0.216122   | 3.2       | 1.803709  |

| AP2_peak  |                 |                |           |           |            |            |            |            |            |            |           |           |
|-----------|-----------------|----------------|-----------|-----------|------------|------------|------------|------------|------------|------------|-----------|-----------|
| Step (nA) | Experiment mean | Experiment std | C10 value | C10 error | CP15 value | CP15 error | Tu19 value | Tu19 error | To21 value | To21 error | M18 value | M18 error |



|     |         |        |          |          |          |          |          |          |          |          |          |          |
|-----|---------|--------|----------|----------|----------|----------|----------|----------|----------|----------|----------|----------|
| 0.8 | 26.2669 | 9.5008 | -6.28433 | 3.426157 |          |          | 8.708374 | 1.84811  | 21.30153 | 0.522627 | 36.93858 | 1.123241 |
| 1   | 23.8077 | 10.123 | -19.0622 | 4.234901 | 9.859355 | 1.377886 | -10.939  | 3.432451 | 9.596994 | 1.403804 | 33.72941 | 0.980115 |

| AP2_width |                 |                |           |           |            |            |            |            |            |            |           |           |
|-----------|-----------------|----------------|-----------|-----------|------------|------------|------------|------------|------------|------------|-----------|-----------|
| Step (nA) | Experiment mean | Experiment std | C10 value | C10 error | CP15 value | CP15 error | Tu19 value | Tu19 error | To21 value | To21 error | M18 value | M18 error |
| 0.8       | 0.7907          | 0.1227         | 18.333    | 142.969   |            |            | 1.233277   | 3.606982   | 0.6627     | 1.043198   | 1.23267   | 3.602039  |
| 1         | 0.8552          | 0.1207         | 10.95451  | 83.67283  | 1.540434   | 5.677166   | 1.18124    | 2.70124    | 0.758359   | 0.802326   | 1.242332  | 3.207392  |

| AP_amplitude |                 |                |           |           |            |            |            |            |            |            |           |           |
|--------------|-----------------|----------------|-----------|-----------|------------|------------|------------|------------|------------|------------|-----------|-----------|
| Step (nA)    | Experiment mean | Experiment std | C10 value | C10 error | CP15 value | CP15 error | Tu19 value | Tu19 error | To21 value | To21 error | M18 value | M18 error |
| 0.8          | 72.712          | 8.9022         | 58.66097  | 1.578378  |            |            | 57.24089   | 1.737898   | 68.10506   | 0.517506   | 83.58688  | 1.221594  |
| 1            | 68.9557         | 9.4164         | 51.47802  | 1.856089  | 64.17996   | 0.507173   | 55.67496   | 1.410384   | 64.58947   | 0.463683   | 82.1769   | 1.404061  |

| AP_amplitude_change |                 |                |           |           |            |            |            |            |            |            |           |           |
|---------------------|-----------------|----------------|-----------|-----------|------------|------------|------------|------------|------------|------------|-----------|-----------|
| Step (nA)           | Experiment mean | Experiment std | C10 value | C10 error | CP15 value | CP15 error | Tu19 value | Tu19 error | To21 value | To21 error | M18 value | M18 error |
| 0.8                 | -0.1681         | 0.0809         | -0.28105  | 1.39619   |            |            | -0.28863   | 1.489811   | -0.30311   | 1.668848   | -0.21805  | 0.61744   |
| 1                   | -0.2138         | 0.0925         | -0.3798   | 1.794642  | -0.18393   | 0.322882   | -0.31476   | 1.091428   | -0.32425   | 1.194026   | -0.2311   | 0.187015  |

| AP_amplitude_from_voltagebase |                 |                |           |           |            |            |            |            |            |            |           |           |
|-------------------------------|-----------------|----------------|-----------|-----------|------------|------------|------------|------------|------------|------------|-----------|-----------|
| Step (nA)                     | Experiment mean | Experiment std | C10 value | C10 error | CP15 value | CP15 error | Tu19 value | Tu19 error | To21 value | To21 error | M18 value | M18 error |
| 0.8                           | 93.084          | 11.1059        | 78.26485  | 1.334349  | 77.93612   | 1.363949   | 77.536     | 1.399976   | 94.56439   | 0.133297   | 106.7112  | 1.227024  |
| 1                             | 89.7448         | 11.789         | 73.13733  | 1.408726  | 76.84316   | 1.094379   | 77.07963   | 1.074321   | 92.13278   | 0.20256    | 106.0887  | 1.386367  |

| AP_begin_voltage |  |  |  |  |  |  |  |  |  |  |  |  |
|------------------|--|--|--|--|--|--|--|--|--|--|--|--|
|------------------|--|--|--|--|--|--|--|--|--|--|--|--|

| Step (nA) | Experiment mean | Experiment std | C10 value | C10 error | CP15 value | CP15 error | Tu19 value | Tu19 error | To21 value | To21 error | M18 value | M18 error |
|-----------|-----------------|----------------|-----------|-----------|------------|------------|------------|------------|------------|------------|-----------|-----------|
| 0.8       | -49.3576        | 6.4407         | -44.2408  | 0.794445  |            |            | -44.7338   | 0.717905   | -46.9961   | 0.366646   | -46.5256  | 0.439701  |
| 1         | -49.1419        | 7.24           | -42.2679  | 0.949453  | -54.5437   | 0.746098   | -43.6409   | 0.759813   | -45.1043   | 0.557686   | -45.7739  | 0.465196  |

| AP_begin_width |                 |                |           |           |            |            |            |            |            |            |           |           |
|----------------|-----------------|----------------|-----------|-----------|------------|------------|------------|------------|------------|------------|-----------|-----------|
| Step (nA)      | Experiment mean | Experiment std | C10 value | C10 error | CP15 value | CP15 error | Tu19 value | Tu19 error | To21 value | To21 error | M18 value | M18 error |
| 0.8            | 1.7972          | 0.3422         | 3.972131  | 6.355731  |            |            | 4.028302   | 6.519877   | 2.433333   | 1.858952   | 3.027273  | 3.594602  |
| 1              | 1.8931          | 0.3592         | 3.859722  | 5.475006  | 3.3        | 3.916759   | 4.07931    | 6.086332   | 2.364286   | 1.311764   | 3.033333  | 3.174369  |

| AP_duration |                 |                |           |           |            |            |            |            |            |            |           |           |
|-------------|-----------------|----------------|-----------|-----------|------------|------------|------------|------------|------------|------------|-----------|-----------|
| Step (nA)   | Experiment mean | Experiment std | C10 value | C10 error | CP15 value | CP15 error | Tu19 value | Tu19 error | To21 value | To21 error | M18 value | M18 error |
| 0.8         | 1.9937          | 0.1717         | 2.732787  | 4.304525  |            |            | 2.924528   | 5.421248   | 2.1        | 0.619103   | 3.163636  | 6.81384   |
| 1           | 2.0392          | 0.1693         | 2.198611  | 0.94159   | 3.55       | 8.923804   | 2.886207   | 5.002994   | 2.1        | 0.359126   | 3.153333  | 6.580823  |

| AP_duration_change |                 |                |           |           |            |            |            |            |            |            |           |           |
|--------------------|-----------------|----------------|-----------|-----------|------------|------------|------------|------------|------------|------------|-----------|-----------|
| Step (nA)          | Experiment mean | Experiment std | C10 value | C10 error | CP15 value | CP15 error | Tu19 value | Tu19 error | To21 value | To21 error | M18 value | M18 error |
| 0.8                | 0.1391          | 0.0966         | -0.34518  | 5.013203  |            |            | -0.28565   | 4.39697    | -0.68182   | 8.498118   | -0.49524  | 6.566647  |
| 1                  | 0.1828          | 0.0904         | -0.40362  | 6.486966  | -0.33333   | 5.70944    | -0.21053   | 4.350955   | -0.57846   | 8.421035   | -0.39148  | 6.352694  |

| AP_duration_half_width |                 |                |           |           |            |            |            |            |            |            |           |           |
|------------------------|-----------------|----------------|-----------|-----------|------------|------------|------------|------------|------------|------------|-----------|-----------|
| Step (nA)              | Experiment mean | Experiment std | C10 value | C10 error | CP15 value | CP15 error | Tu19 value | Tu19 error | To21 value | To21 error | M18 value | M18 error |
| 0.8                    | 0.8029          | 0.0943         | 1.262295  | 4.871634  |            |            | 1.469811   | 7.07223    | 0.7        | 1.091198   | 1.236364  | 4.596645  |
| 1                      | 0.8315          | 0.0942         | 1.211111  | 4.029842  | 1.4        | 6.035032   | 1.598276   | 8.139871   | 0.7        | 1.395966   | 1.253333  | 4.478061  |

| AP_duration_half_width_change |                 |                |           |           |            |            |            |            |            |            |           |           |
|-------------------------------|-----------------|----------------|-----------|-----------|------------|------------|------------|------------|------------|------------|-----------|-----------|
| Step (nA)                     | Experiment mean | Experiment std | C10 value | C10 error | CP15 value | CP15 error | Tu19 value | Tu19 error | To21 value | To21 error | M18 value | M18 error |
| 0.8                           | 0.1537          | 0.1399         | -0.46875  | 4.449249  |            |            | -0.41308   | 4.0513     | -0.3       | 3.243031   | -0.12143  | 1.966609  |
| 1                             | 0.2238          | 0.1138         | -0.57638  | 7.031471  | -0.22222   | 3.919352   | -0.35298   | 5.068387   | -0.3       | 4.602812   | -0.16667  | 3.431166  |

| AP_fall_rate |                 |                |           |           |            |            |            |            |            |            |           |           |
|--------------|-----------------|----------------|-----------|-----------|------------|------------|------------|------------|------------|------------|-----------|-----------|
| Step (nA)    | Experiment mean | Experiment std | C10 value | C10 error | CP15 value | CP15 error | Tu19 value | Tu19 error | To21 value | To21 error | M18 value | M18 error |
| 0.8          | -52.9764        | 9.141          | -15.8216  | 4.064629  | -22.4207   | 3.342705   | -20.1243   | 3.593926   | -43.7642   | 1.007789   | -35.2976  | 1.93401   |
| 1            | -48.6185        | 9.8823         | -13.0491  | 3.599303  | -23.9712   | 2.494082   | -19.7777   | 2.918431   | -43.3879   | 0.529289   | -35.11    | 1.366939  |

| AP_fall_time |                 |                |           |           |            |            |            |            |            |            |           |           |
|--------------|-----------------|----------------|-----------|-----------|------------|------------|------------|------------|------------|------------|-----------|-----------|
| Step (nA)    | Experiment mean | Experiment std | C10 value | C10 error | CP15 value | CP15 error | Tu19 value | Tu19 error | To21 value | To21 error | M18 value | M18 error |
| 0.8          | 1.5073          | 0.1191         | 1.708065  | 1.68568   | 3.1        | 13.3728    | 2.074074   | 4.758808   | 1.5        | 0.061293   | 2.433333  | 7.775259  |
| 1            | 1.5263          | 0.142          | 1.265753  | 1.834835  | 2.9        | 9.673944   | 1.967797   | 3.109131   | 1.44       | 0.607746   | 2.4       | 6.152817  |

| AP_height |                 |                |           |           |            |            |            |            |            |            |           |           |
|-----------|-----------------|----------------|-----------|-----------|------------|------------|------------|------------|------------|------------|-----------|-----------|
| Step (nA) | Experiment mean | Experiment std | C10 value | C10 error | CP15 value | CP15 error | Tu19 value | Tu19 error | To21 value | To21 error | M18 value | M18 error |
| 0.8       | 23.3497         | 10.9233        | 14.4747   | 0.812483  | 11.63042   | 1.072869   | 12.56237   | 0.987553   | 22.16316   | 0.108625   | 37.07802  | 1.256792  |
| 1         | 19.8138         | 11.8553        | 9.347181  | 0.882864  | 10.53747   | 0.782463   | 12.10599   | 0.650158   | 19.73156   | 0.006937   | 36.45549  | 1.403734  |

| AP_rise_rate |                 |                |           |           |            |            |            |            |            |            |           |           |
|--------------|-----------------|----------------|-----------|-----------|------------|------------|------------|------------|------------|------------|-----------|-----------|
| Step (nA)    | Experiment mean | Experiment std | C10 value | C10 error | CP15 value | CP15 error | Tu19 value | Tu19 error | To21 value | To21 error | M18 value | M18 error |

|     |          |         |          |          |          |          |          |          |          |          |          |          |
|-----|----------|---------|----------|----------|----------|----------|----------|----------|----------|----------|----------|----------|
| 0.8 | 160.9801 | 45.3824 | 76.48788 | 1.861784 |          |          | 79.12712 | 1.803628 | 108.1219 | 1.164729 | 116.6858 | 0.976025 |
| 1   | 146.3948 | 43.2626 | 62.81344 | 1.931954 | 80.22495 | 1.529493 | 74.09294 | 1.671232 | 99.49018 | 1.084184 | 112.5158 | 0.783101 |

| AP_rise_rate_change |                 |                |           |           |            |            |            |            |            |            |           |           |
|---------------------|-----------------|----------------|-----------|-----------|------------|------------|------------|------------|------------|------------|-----------|-----------|
| Step (nA)           | Experiment mean | Experiment std | C10 value | C10 error | CP15 value | CP15 error | Tu19 value | Tu19 error | To21 value | To21 error | M18 value | M18 error |
| 0.8                 | -0.2631         | 0.1487         | 0.333875  | 4.01463   |            |            | 0.870629   | 7.624274   | 4.817439   | 34.16637   | 3.358744  | 24.35672  |
| 1                   | -0.3416         | 0.1404         | -0.07933  | 1.868044  | 1.241176   | 11.27333   | 0.47272    | 5.800002   | 2.843277   | 22.68431   | 2.293171  | 18.76617  |

| AP_rise_time |                 |                |           |           |            |            |            |            |            |            |           |           |
|--------------|-----------------|----------------|-----------|-----------|------------|------------|------------|------------|------------|------------|-----------|-----------|
| Step (nA)    | Experiment mean | Experiment std | C10 value | C10 error | CP15 value | CP15 error | Tu19 value | Tu19 error | To21 value | To21 error | M18 value | M18 error |
| 0.8          | 0.4864          | 0.0935         | 1.036066  | 5.878776  |            |            | 0.85283    | 3.919039   | 0.633333   | 1.57148    | 0.718182  | 2.47895   |
| 1            | 0.5129          | 0.1001         | 0.947222  | 4.338883  | 0.8        | 2.868132   | 0.92069    | 4.073823   | 0.657143   | 1.440988   | 0.733333  | 2.202131  |

| AP_width  |                 |                |           |           |            |            |            |            |            |            |           |           |
|-----------|-----------------|----------------|-----------|-----------|------------|------------|------------|------------|------------|------------|-----------|-----------|
| Step (nA) | Experiment mean | Experiment std | C10 value | C10 error | CP15 value | CP15 error | Tu19 value | Tu19 error | To21 value | To21 error | M18 value | M18 error |
| 0.8       | 0.9107          | 0.1229         | 1.883607  | 7.916245  |            |            | 1.745283   | 6.790749   | 0.866667   | 0.358286   | 1.572727  | 5.386715  |
| 1         | 0.9291          | 0.1458         | 1.798611  | 5.963725  | 1.25       | 2.20096    | 1.765517   | 5.736744   | 0.821429   | 0.738487   | 1.613333  | 4.692958  |

| APlast_amp |                 |                |           |           |            |            |            |            |            |            |           |           |
|------------|-----------------|----------------|-----------|-----------|------------|------------|------------|------------|------------|------------|-----------|-----------|
| Step (nA)  | Experiment mean | Experiment std | C10 value | C10 error | CP15 value | CP15 error | Tu19 value | Tu19 error | To21 value | To21 error | M18 value | M18 error |
| 0.8        | 65.4508         | 11.0654        | 58.42831  | 0.634635  | 63.44244   | 0.181499   | 59.88565   | 0.502932   | 68.13201   | 0.242306   | 84.06944  | 1.6826    |
| 1          | 60.9569         | 12.1796        | 52.35967  | 0.705871  | 64.09396   | 0.257566   | 57.85012   | 0.255081   | 66.34042   | 0.442011   | 82.43395  | 1.763362  |

| ISI_values |  |  |  |  |  |  |  |  |  |  |  |  |
|------------|--|--|--|--|--|--|--|--|--|--|--|--|
|------------|--|--|--|--|--|--|--|--|--|--|--|--|

| Step (nA) | Experiment mean | Experiment std | C10 value | C10 error | CP15 value | CP15 error | Tu19 value | Tu19 error | To21 value | To21 error | M18 value | M18 error |
|-----------|-----------------|----------------|-----------|-----------|------------|------------|------------|------------|------------|------------|-----------|-----------|
| 0.8       | 48.4821         | 30.9888        | 6.206667  | 1.364217  |            |            | 7.496154   | 1.322605   | 137.9      | 2.885491   | 34.72     | 0.444099  |
| 1         | 34.5385         | 12.0706        | 5.395775  | 2.414356  | 179.4      | 12.00118   | 6.798246   | 2.298167   | 27.68462   | 0.567816   | 26.65     | 0.65353   |

| amp_drop_first_last |                 |                |           |           |            |            |            |            |            |            |           |           |
|---------------------|-----------------|----------------|-----------|-----------|------------|------------|------------|------------|------------|------------|-----------|-----------|
| Step (nA)           | Experiment mean | Experiment std | C10 value | C10 error | CP15 value | CP15 error | Tu19 value | Tu19 error | To21 value | To21 error | M18 value | M18 error |
| 0.8                 | 11.8027         | 6.7405         | 3.260094  | 1.267355  |            |            | 1.081422   | 1.590576   | 4.457614   | 1.089694   | 0.353906  | 1.698508  |
| 1                   | 14.9766         | 7.6991         | 9.624035  | 0.69522   | 2.926542   | 1.565126   | 2.886807   | 1.570287   | 2.444336   | 1.627757   | 0.792784  | 1.842269  |

| amp_drop_first_second |                 |                |           |           |            |            |            |            |            |            |           |           |
|-----------------------|-----------------|----------------|-----------|-----------|------------|------------|------------|------------|------------|------------|-----------|-----------|
| Step (nA)             | Experiment mean | Experiment std | C10 value | C10 error | CP15 value | CP15 error | Tu19 value | Tu19 error | To21 value | To21 error | M18 value | M18 error |
| 0.8                   | 4.2233          | 2.8446         | 24.08695  | 6.982932  |            |            | 6.783199   | 0.899915   | 4.024351   | 0.069939   | 0.323771  | 1.370853  |
| 1                     | 5.6801          | 3.1828         | 38.27494  | 10.24093  | 2.48044    | 1.005297   | 27.21386   | 6.765666   | 13.58332   | 2.483103   | 3.513167  | 0.680826  |

| amp_drop_second_last |                 |                |           |           |            |            |            |            |            |            |           |           |
|----------------------|-----------------|----------------|-----------|-----------|------------|------------|------------|------------|------------|------------|-----------|-----------|
| Step (nA)            | Experiment mean | Experiment std | C10 value | C10 error | CP15 value | CP15 error | Tu19 value | Tu19 error | To21 value | To21 error | M18 value | M18 error |
| 0.8                  | 7.5794          | 5.5013         | -20.8269  | 5.163553  |            |            | -5.70178   | 2.414189   | 0.433264   | 1.29899    | 0.030135  | 1.372269  |
| 1                    | 9.2965          | 6.0702         | -28.6509  | 6.251426  | 0.446101   | 1.458008   | -24.3271   | 5.539118   | -11.139    | 3.366526   | -2.72038  | 1.979652  |

| doublet_ISI |                 |                |           |           |            |            |            |            |            |            |           |           |
|-------------|-----------------|----------------|-----------|-----------|------------|------------|------------|------------|------------|------------|-----------|-----------|
| Step (nA)   | Experiment mean | Experiment std | C10 value | C10 error | CP15 value | CP15 error | Tu19 value | Tu19 error | To21 value | To21 error | M18 value | M18 error |
| 0.8         | 15.0424         | 9.8883         | 21.7      | 0.673281  |            |            | 6.6        | 0.853777   | 21         | 0.60249    | 13.8      | 0.125643  |
| 1           | 10.1299         | 4.2819         | 14.5      | 1.020598  | 128.5      | 27.64429   | 5.4        | 1.104626   | 11.4       | 0.296621   | 11        | 0.203204  |



|     |         |         |          |          |          |          |          |          |          |          |          |          |
|-----|---------|---------|----------|----------|----------|----------|----------|----------|----------|----------|----------|----------|
| 0.8 | 31.5698 | 10.6864 | 156.7636 | 11.71524 | 370.3704 | 31.7039  | 135.5762 | 9.732595 | 13.25381 | 1.713953 | 32.87671 | 0.122297 |
| 1   | 37.5047 | 9.4431  | 183.0491 | 15.41278 | 9.674299 | 2.947168 | 149.5564 | 11.86599 | 40.01067 | 0.265376 | 41.32231 | 0.404276 |

| min_AHP_values |                 |                |           |           |            |            |            |            |            |            |           |           |
|----------------|-----------------|----------------|-----------|-----------|------------|------------|------------|------------|------------|------------|-----------|-----------|
| Step (nA)      | Experiment mean | Experiment std | C10 value | C10 error | CP15 value | CP15 error | Tu19 value | Tu19 error | To21 value | To21 error | M18 value | M18 error |
| 0.8            | -58.0613        | 5.8413         | -48.4662  | 1.642635  | -68.294    | 1.751783   | -50.2966   | 1.329268   | -57.4603   | 0.102893   | -64.1744  | 1.046529  |
| 1              | -57.4225        | 6.6545         | -45.4972  | 1.792068  | -67.2332   | 1.474293   | -48.1332   | 1.395942   | -55.2275   | 0.329854   | -62.0435  | 0.694414  |

| min_voltage_between_spikes |                 |                |           |           |            |            |            |            |            |            |           |           |
|----------------------------|-----------------|----------------|-----------|-----------|------------|------------|------------|------------|------------|------------|-----------|-----------|
| Step (nA)                  | Experiment mean | Experiment std | C10 value | C10 error | CP15 value | CP15 error | Tu19 value | Tu19 error | To21 value | To21 error | M18 value | M18 error |
| 0.8                        | -58.9266        | 5.8058         | -48.5823  | 1.781712  |            |            | -50.2836   | 1.488678   | -57.0627   | 0.321034   | -64.0736  | 0.88653   |
| 1                          | -58.4913        | 6.7084         | -45.2405  | 1.975258  | -67.0046   | 1.269052   | -48.2188   | 1.531292   | -55.1333   | 0.500566   | -61.9533  | 0.516068  |

| peak_voltage |                 |                |           |           |            |            |            |            |            |            |           |           |
|--------------|-----------------|----------------|-----------|-----------|------------|------------|------------|------------|------------|------------|-----------|-----------|
| Step (nA)    | Experiment mean | Experiment std | C10 value | C10 error | CP15 value | CP15 error | Tu19 value | Tu19 error | To21 value | To21 error | M18 value | M18 error |
| 0.8          | 23.3497         | 10.9233        | 14.4747   | 0.812483  | 11.63042   | 1.072869   | 12.56237   | 0.987553   | 22.16316   | 0.108625   | 37.07802  | 1.256792  |
| 1            | 19.8138         | 11.8553        | 9.347181  | 0.882864  | 10.53747   | 0.782463   | 12.10599   | 0.650158   | 19.73156   | 0.006937   | 36.45549  | 1.403734  |

| spike_half_width |                 |                |           |           |            |            |            |            |            |            |           |           |
|------------------|-----------------|----------------|-----------|-----------|------------|------------|------------|------------|------------|------------|-----------|-----------|
| Step (nA)        | Experiment mean | Experiment std | C10 value | C10 error | CP15 value | CP15 error | Tu19 value | Tu19 error | To21 value | To21 error | M18 value | M18 error |
| 0.8              | 0.7784          | 0.117          | 1.906132  | 9.638731  | 1.686305   | 7.759868   | 1.593291   | 6.964883   | 0.715492   | 0.537673   | 1.306373  | 4.512586  |
| 1                | 0.8323          | 0.1475         | 1.735355  | 6.122407  | 1.59268    | 5.155117   | 1.743344   | 6.176572   | 0.677314   | 1.050752   | 1.314855  | 3.271556  |

| spike_width2 |  |  |  |  |  |  |  |  |  |  |  |  |
|--------------|--|--|--|--|--|--|--|--|--|--|--|--|
|--------------|--|--|--|--|--|--|--|--|--|--|--|--|

| Step (nA) | Experiment mean | Experiment std | C10 value | C10 error | CP15 value | CP15 error | Tu19 value | Tu19 error | To21 value | To21 error | M18 value | M18 error |
|-----------|-----------------|----------------|-----------|-----------|------------|------------|------------|------------|------------|------------|-----------|-----------|
| 0.8       | 0.7538          | 0.103          | 1.495442  | 7.200404  |            |            | 1.467964   | 6.933634   | 0.612595   | 1.370919   | 1.075016  | 3.118601  |
| 1         | 0.7911          | 0.119          | 1.638763  | 7.123216  | 1.40962    | 5.19765    | 1.630358   | 7.052588   | 0.598542   | 1.618138   | 1.085496  | 2.473916  |

| time_to_first_spike |                 |                |           |           |            |            |            |            |            |            |           |           |
|---------------------|-----------------|----------------|-----------|-----------|------------|------------|------------|------------|------------|------------|-----------|-----------|
| Step (nA)           | Experiment mean | Experiment std | C10 value | C10 error | CP15 value | CP15 error | Tu19 value | Tu19 error | To21 value | To21 error | M18 value | M18 error |
| 0.8                 | 14.1697         | 13.3451        | 1.4       | 0.956883  | 2.7        | 0.859469   | 1.9        | 0.919416   | 5          | 0.687121   | 4         | 0.762055  |
| 1                   | 8.6998          | 6.7175         | 1.2       | 1.116457  | 2.2        | 0.967592   | 1.6        | 1.056911   | 3.6        | 0.759181   | 3.1       | 0.833614  |

| time_to_second_spike |                 |                |           |           |            |            |            |            |            |            |           |           |
|----------------------|-----------------|----------------|-----------|-----------|------------|------------|------------|------------|------------|------------|-----------|-----------|
| Step (nA)            | Experiment mean | Experiment std | C10 value | C10 error | CP15 value | CP15 error | Tu19 value | Tu19 error | To21 value | To21 error | M18 value | M18 error |
| 0.8                  | 29.2121         | 22.1682        | 23.1      | 0.275715  |            |            | 8.5        | 0.934316   | 26         | 0.144897   | 17.8      | 0.514796  |
| 1                    | 18.8298         | 10.3516        | 15.7      | 0.302349  | 130.7      | 10.80704   | 7          | 1.142799   | 15         | 0.369972   | 14.1      | 0.456915  |

| time_to_last_spike |                 |                |           |           |            |            |            |            |            |            |           |           |
|--------------------|-----------------|----------------|-----------|-----------|------------|------------|------------|------------|------------|------------|-----------|-----------|
| Step (nA)          | Experiment mean | Experiment std | C10 value | C10 error | CP15 value | CP15 error | Tu19 value | Tu19 error | To21 value | To21 error | M18 value | M18 error |
| 0.8                | 302.7331        | 85.1578        | 395.5     | 1.089353  | 2.7        | 3.52326    | 398.3      | 1.122233   | 301.8      | 0.010957   | 365       | 0.731194  |
| 1                  | 309.4068        | 100.0108       | 398.8     | 0.893835  | 310.1      | 0.006931   | 394.5      | 0.85084    | 374.9      | 0.654861   | 387.2     | 0.777848  |
